# Supplementary material
Source: publisher figshare collection journal article supplement (https://aacr.figshare.com/articles/dataset/_/22430689)
Supplement: Supplementary file 1 [file 39877024]

## SUPPLEMENTARY TABLES

### Table S1 – Materials and Methods

#### Plasmids

pLenti6-miRNA-Ctrl  
pLenti6-miRNA-KMT9 $\alpha$

#### miRNA sequences (5'-3')

##### Human miKMT9 $\alpha$

###### *Top strand*

TGCTGATGTGAACTTTGTTACAGCGTGT TTTGGCCACTGACTGACACGCTGTAA  
AAGTTCACAT

###### *Bottom strand*

CCTGATGTGAACTTTTACAGCGTGTCAGTCAGTGGCCAAAACACGCTGTAACAA  
AGTTCACATC

##### Human miCtrl

###### *Top strand*

TGCTGAAATGTACTGCGCGTGGAGACGTTTTGGCCACTGACTGACGTCTCCAC  
GCAGTACATTT

###### *Bottom strand*

CCTGAAATGTACTGCGTGGAGACGTCAGTCAGTGGCCAAAACGTCTCCACGCG  
CAGTACATTTTC

Control miRNA (miCtrl) or miRNA directed against *KMT9 $\alpha$*  (miKMT9 $\alpha$ ) were designed using BLOCK-IT™ RNAi Designer. Each oligonucleotides pair encodes for a pre-miRNA and contains a linker sequence (purple), the mature miRNA sequence (green), a loop sequence (black) and a sequence containing the nucleotides 1-8 and 11-21 of the 21-mer target sequence (red).

#### Primer sequences qRT-PCR (5'-3')

|                                |                                                   |
|--------------------------------|---------------------------------------------------|
| <i>Aurkb</i>                   | CAGACTTTGGCTGGTCCGGT and TATGCATGCGCCCCTCAATC     |
| <i>E2f1</i>                    | CAGCTGCAACTGCTTTCCGG and AGGAGGGGCCTTGATCACTA     |
| <i>Esco2</i>                   | CACCACCGATTTCTGGAAGGA and TGGCAGGACCAACACAATCT    |
| <i>Hprt</i>                    | GTTAAGCAGTACAGCCCCAAA and AGGGCATATCCAACAACAAACTT |
| <i>HPRT</i>                    | CCTGGCGTCGTGATTAGTGAT and AGACGTTTCAGTCCTGTCCATAA |
| <i>Kmt9<math>\alpha</math></i> | CAGCCGCATGTACCTTGGAA and TCCACGACTTCTACCTCTTCA    |
| <i>KMT9<math>\alpha</math></i> | ACGTTTCTGCTTTTGGACGC and TCAGTGCACATGTACAAAGCC    |
| <i>Mcm6</i>                    | ACCTTCTCTTTGCCCGACAG and CTGGCGGAGACGTTTGTACT     |
| <i>Pclaf</i>                   | CTGGCGGAGACGTTTGTACT and TGGGTTCCCTCCTGCATACTT    |
| <i>Pmaip1</i>                  | GAAGTCGCAAAGAGCAGGA and GTTGAGCACACTCGTCCTTCA     |
| <i>Prr11</i>                   | TTGTGCAAGCTCCGAGAAAAC and ATTCGTCGTTGGAGCACAGG    |
| <i>Rad51c</i>                  | GGTTTCAGACGGCGGAGGA and CGGCACATCTTGGTTTATTTGT    |
| <i>Rpa2</i>                    | ACCAGGATGTGGAATAGCGG and ACAATATGCTGGGCTCGGAC     |
| <i>Tgfb2</i>                   | CAGCGCTACATCGATAGCAA and CCTCGAGCTCTTCGCTTTTA     |
| <i>Top2a</i>                   | CCTCGGGGCAAAGAGTCAT and CTATTCGTTGCCGGAG          |

**Table S2 – List of the 12 significantly differentially expressed genes in KMT9 $\alpha$ -deficient compared to KMT9 $\alpha$ -proficient colon ( $p < 1e-6$ )**

| Gene name      | Fold change |
|----------------|-------------|
| <i>Ceacam2</i> | 12.04       |
| <i>Dmtn</i>    | 20.86       |
| <i>Gm15915</i> | 7.05        |
| <i>H2-Aa</i>   | 0.22        |
| <i>H2-Ab1</i>  | 0.26        |
| <i>Krt12</i>   | 7.65        |
| <i>Lpo</i>     | 36.74       |
| <i>N6amt1</i>  | 0.51        |
| <i>Phyhip</i>  | 19.84       |
| <i>Scpep1</i>  | 1.62        |
| <i>Serinc3</i> | 1.49        |
| <i>Slpi</i>    | 0.13        |

**Table S3 – Gene list of pro-apoptotic genes used to calculate gene scores with Seurat depicted in figure 3I.**

| <b>Gene symbol</b>    | <b>Full gene name</b>                                                |
|-----------------------|----------------------------------------------------------------------|
| <b><i>Aifm3</i></b>   | apoptosis inducing factor mitochondria associated 3                  |
| <b><i>Anxa1</i></b>   | annexin a1                                                           |
| <b><i>App</i></b>     | amyloid beta precursor protein                                       |
| <b><i>Atf3</i></b>    | activating transcription factor 3                                    |
| <b><i>Bax</i></b>     | bcl2 associated x, apoptosis regulator                               |
| <b><i>Bcap31</i></b>  | b cell receptor associated protein 31                                |
| <b><i>Bcl10</i></b>   | bcl10 immune signaling adaptor                                       |
| <b><i>Bcl2l11</i></b> | bcl2 like 11                                                         |
| <b><i>Bid</i></b>     | bh3 interacting domain death agonist                                 |
| <b><i>Bik</i></b>     | bcl2 interacting killer                                              |
| <b><i>Bmf</i></b>     | bcl2 modifying factor                                                |
| <b><i>Bmp2</i></b>    | bone morphogenetic protein 2                                         |
| <b><i>Bnip3l</i></b>  | bcl2 interacting protein 3 like                                      |
| <b><i>Brca1</i></b>   | brca1 dna repair associated                                          |
| <b><i>Btg2</i></b>    | btg anti-proliferation factor 2                                      |
| <b><i>Btg3</i></b>    | btg anti-proliferation factor 3                                      |
| <b><i>Casp1</i></b>   | caspase 1                                                            |
| <b><i>Casp2</i></b>   | caspase 2                                                            |
| <b><i>Casp3</i></b>   | caspase 3                                                            |
| <b><i>Casp4</i></b>   | caspase 4                                                            |
| <b><i>Casp6</i></b>   | caspase 6                                                            |
| <b><i>Casp7</i></b>   | caspase 7                                                            |
| <b><i>Casp8</i></b>   | caspase 8                                                            |
| <b><i>Casp9</i></b>   | caspase 9                                                            |
| <b><i>Cdkn1a</i></b>  | cyclin dependent kinase inhibitor 1a                                 |
| <b><i>Cdkn1b</i></b>  | cyclin dependent kinase inhibitor 1b                                 |
| <b><i>Cyld</i></b>    | cyld lysine 63 deubiquitinase                                        |
| <b><i>Dap</i></b>     | death associated protein                                             |
| <b><i>Dap3</i></b>    | death associated protein 3                                           |
| <b><i>Ddit3</i></b>   | dna damage inducible transcript 3                                    |
| <b><i>Dffa</i></b>    | dna fragmentation factor subunit alpha                               |
| <b><i>Diablo</i></b>  | diablo iap-binding mitochondrial protein                             |
| <b><i>Dnaja1</i></b>  | dnaj heat shock protein family (hsp40) member a1                     |
| <b><i>Dnajc3</i></b>  | dnaj heat shock protein family (hsp40) member c3                     |
| <b><i>Dnm1l</i></b>   | dynamamin 1 like                                                     |
| <b><i>Egr3</i></b>    | early growth response 3                                              |
| <b><i>Fas</i></b>     | fas cell surface death receptor                                      |
| <b><i>Fdxr</i></b>    | ferredoxin reductase                                                 |
| <b><i>Gadd45a</i></b> | growth arrest and dna damage inducible alpha                         |
| <b><i>Gadd45b</i></b> | growth arrest and dna damage inducible beta                          |
| <b><i>Hmgb2</i></b>   | high mobility group box 2                                            |
| <b><i>Ifngr1</i></b>  | interferon gamma receptor 1                                          |
| <b><i>Il18</i></b>    | interleukin 18                                                       |
| <b><i>Irf1</i></b>    | interferon regulatory factor 1                                       |
| <b><i>Madd</i></b>    | map kinase activating death domain                                   |
| <b><i>Nedd9</i></b>   | neural precursor cell expressed, developmentally down-regulated<br>9 |
| <b><i>Nefh</i></b>    | neurofilament heavy                                                  |
| <b><i>Pdcd4</i></b>   | programmed cell death 4                                              |
| <b><i>Pmaip1</i></b>  | phorbol-12-myristate-13-acetate-induced protein 1                    |

|                         |                                                        |
|-------------------------|--------------------------------------------------------|
| <b><i>Ppp2r5b</i></b>   | protein phosphatase 2 regulatory subunit b'beta        |
| <b><i>Psen1</i></b>     | presenilin 1                                           |
| <b><i>Psen2</i></b>     | presenilin 2                                           |
| <b><i>Rara</i></b>      | retinoic acid receptor alpha                           |
| <b><i>Rela</i></b>      | rela proto-oncogene, nf-kb subunit                     |
| <b><i>Rhob</i></b>      | ras homolog family member b                            |
| <b><i>Rock1</i></b>     | rho associated coiled-coil containing protein kinase 1 |
| <b><i>Sat1</i></b>      | spermidine/spermine n1-acetyltransferase 1             |
| <b><i>Slc20a1</i></b>   | solute carrier family 20 member 1                      |
| <b><i>Smad7</i></b>     | smad family member 7                                   |
| <b><i>Tap1</i></b>      | transporter 1, atp binding cassette subfamily b member |
| <b><i>Tgfb2</i></b>     | transforming growth factor beta 2                      |
| <b><i>Tgfb3</i></b>     | transforming growth factor beta receptor 3             |
| <b><i>Tnf</i></b>       | tumour necrosis factor                                 |
| <b><i>Tnfrsf12a</i></b> | tnf receptor superfamily member 12a                    |
| <b><i>Tnfsf10</i></b>   | tnf superfamily member 10                              |
| <b><i>Tspo</i></b>      | translocator protein                                   |
| <b><i>Txnip</i></b>     | thioredoxin interacting protein                        |
| <b><i>Vdac2</i></b>     | voltage dependent anion channel 2                      |
